# Supplementary material for: Anionic zinc-trimesic acid MOFs with unusual topologies: Reversible hydration studies
Source: Royal Society of Chemistry journal article supplement (doi:10.1039/b922690g), 2010-01-01
Supplement: b922690g.pdf [file b922690g.pdf]

#####  
12:kate1ideal  
#####

Structure consists of molecules (ZD1). The composition of molecule is O  
Structure consists of molecules (ZE1). The composition of molecule is Si  
Topology for ZD1

-----  
Atom ZD1 links by bridge ligands and has

| Common vertex with                 | R(A-A) |   |       |  | f | Total SA |
|------------------------------------|--------|---|-------|--|---|----------|
| ZE 1 0.0774 0.2769 0.0647 (0 0 0)  | 0.999A | 1 | 14.99 |  |   |          |
| ZE 1 0.2231 0.4226 0.0647 (0 0 -1) | 0.999A | 1 | 14.99 |  |   |          |
| ZE 1 0.2769 0.0774 0.5647 (0 0 0)  | 0.999A | 1 | 15.18 |  |   |          |
| ZE 1 0.4226 0.2231 0.5647 (0 0 0)  | 0.999A | 1 | 15.18 |  |   |          |
| ZE 1 -0.0774 0.2769 0.5647 (0 0 0) | 1.001A | 1 | 19.84 |  |   |          |
| ZE 1 0.2231 0.5774 0.5647 (0 0 0)  | 1.001A | 1 | 19.84 |  |   |          |

Topology for ZE1

-----  
Atom ZE1 links by bridge ligands and has

| Common vertex with                   | R(A-A) |   |       |  | f | Total SA |
|--------------------------------------|--------|---|-------|--|---|----------|
| ZD 1 0.1804 0.3196 0.4229 (0 0 0)    | 0.999A | 1 | 29.97 |  |   |          |
| ZD 1 0.3196 0.1804 -0.0771 (0 0 -1)  | 0.999A | 1 | 30.35 |  |   |          |
| ZD 1 -0.1804 0.3196 -0.0771 (0 0 -1) | 1.001A | 1 | 39.68 |  |   |          |

-----  
Structural group analysis

-----  
Structural group No 1

-----  
Structure consists of 3D framework with ZE2ZD

Coordination sequences

-----  
ZD1: 1 2 3 4 5 6 7 8 9 10  
Num 6 10 38 36 106 80 210 140 346 218  
Cum 7 17 55 91 197 277 487 627 973 1191  
Rad 1.0(0.0) 1.8(0.2) 2.3(0.3) 3.0(0.4) 3.6(0.4) 4.4(0.4) 5.0(0.5) 5.8(0.5) 6.4(0.5) 7.2(0.5)  
Cmp ZE6 ZD10 ZE38 ZD36 ZE106 ZD80 ZE210 ZD140 ZE346 ZD218

-----  
ZE1: 1 2 3 4 5 6 7 8 9 10  
Num 3 14 19 64 53 148 105 268 173 420  
Cum 4 18 37 101 154 302 407 675 848 1268  
Rad 1.0(0.0) 1.6(0.3) 2.3(0.4) 2.8(0.4) 3.6(0.4) 4.2(0.5) 5.0(0.5) 5.6(0.5) 6.4(0.5) 7.0(0.6)  
Cmp ZD3 ZE14 ZD19 ZE64 ZD53 ZE148 ZD105 ZE268 ZD173 ZE420

-----  
TD10=1242

Vertex symbols for selected sublattice

-----

ZD1 Point (Schlafli) symbol: {4<sup>2</sup>;6<sup>10</sup>;8<sup>3</sup>}

Extended point symbol:[4.4.6.6.6.6.6.6.6.6(2).6(2).8(4).8(4).8(8)]

Vertex symbol: [4.4.6.6.6.6.6.6.6.6(2).6(2).8(2).8(2).8(7)]

All rings (up to 10):

[(4,8(4)).(4,8(3)).(6,10(2)).6.6.(6,10(2)).(6,8,10(5)).(6,10).(6,10).(6,8,10(5)).(6(2),8,10).(6(2),8,10).(8(2),10).(8(2),10).8(7)]

-----  
ZE1 Point (Schlafli) symbol: {4;6<sup>2</sup>}

Extended point symbol:[4.6(2).6(2)]

Rings coincide with circuits

All rings (up to 10): [(4,6(2),10(2)).(6(2),8(7),10(2)).(6(2),8(4),10(6))]

-----  
Point (Schlafli) symbol for net: {4;6<sup>2</sup>}2{4<sup>2</sup>;6<sup>10</sup>;8<sup>3</sup>}

3,6-c net with stoichiometry (3-c)2(6-c); 2-nodal net

Topological type: scu/P 4/m m m->I 4 c m (-2b,2a,2c; 1/2,1/2,0);Bond sets: 2,3,4:scu

{4;6<sup>2</sup>}2{4<sup>2</sup>;6<sup>10</sup>;8<sup>3</sup>} - VS [4.6(2).6(2)] [4.4.6.6.6.6.6.6.6.6(2).6(2).8(2).8(2).8(7)]  
(66909 types in 9 databases)

Elapsed time: 248.91 sec.

#####

11:kate2ideal

#####

Structure consists of molecules (ZD1). The composition of molecule is O

Topology for ZD1

-----  
Atom ZD1 links by bridge ligands and has

| Common vertex with | R(A-A)  |        |                   | f      | Total SA |
|--------------------|---------|--------|-------------------|--------|----------|
| ZE 1               | 0.0000  | 0.1925 | -0.2142 (-1 0 -1) | 0.999A | 1 18.64  |
| ZE 1               | 0.5000  | 0.3075 | 0.2858 (0 0 0)    | 0.999A | 1 20.18  |
| ZE 1               | -0.5000 | 0.3075 | 0.2858 (-1 0 0)   | 0.999A | 1 20.18  |
| ZD 1               | 0.0000  | 0.5772 | -0.3808 (0 1 -1)  | 1.002A | 1 20.50  |
| ZD 1               | 0.0000  | 0.5772 | 0.6192 (0 1 0)    | 1.002A | 1 20.50  |

Topology for ZE1

-----  
Atom ZE1 links by bridge ligands and has

| Common vertex with | R(A-A) |        |                | f      | Total SA |
|--------------------|--------|--------|----------------|--------|----------|
| ZD 1               | 0.5000 | 0.0772 | 0.6192 (0 0 0) | 0.999A | 1 31.60  |
| ZD 1               | 1.0000 | 0.4228 | 0.1192 (1 0 0) | 0.999A | 1 34.20  |
| ZD 1               | 0.0000 | 0.4228 | 0.1192 (0 0 0) | 0.999A | 1 34.20  |

-----  
Structural group analysis

-----  
Structural group No 1

-----  
Structure consists of 3D framework with ZE2D

## Coordination sequences

-----  
ZD1: 1 2 3 4 5 6 7 8 9 10  
Num 5 14 30 55 82 114 165 210 254 335  
Cum 6 20 50 105 187 301 466 676 930 1265  
Rad 1.0(0.0) 1.7(0.2) 2.2(0.3) 2.9(0.4) 3.6(0.4) 4.3(0.5) 5.0(0.5) 5.7(0.6) 6.4(0.6) 7.1(0.7)  
Cmp ZD2ZE3 ZD8ZE6 ZD18ZE12 ZD24ZE31 ZD42ZE40 ZD66ZE48 ZD74ZE91  
ZD104ZE106 ZD146ZE108 ZD152ZE183

-----  
ZE1: 1 2 3 4 5 6 7 8 9 10  
Num 3 12 28 47 80 120 147 202 276 303  
Cum 4 16 44 91 171 291 438 640 916 1219  
Rad 1.0(0.0) 1.5(0.2) 2.2(0.4) 2.8(0.4) 3.5(0.4) 4.2(0.4) 4.9(0.5) 5.6(0.5) 6.3(0.6) 7.0(0.6)  
Cmp ZD3 ZD6ZE6 ZD12ZE16 ZD31ZE16 ZD40ZE40 ZD48ZE72 ZD91ZE56 ZD106ZE96  
ZD108ZE168 ZD183ZE120

-----  
TD10=1242

## Vertex symbols for selected sublattice

-----  
ZD1 Point (Schlafli) symbol: {6^9;8}  
Extended point symbol:[6.6.6.6(2).6(2).6(2).6(2).6(2).6(2).8(4)]  
Vertex symbol: [6.6.6.6(2).6(2).6(2).6(2).6(2).6(2).\*]  
All rings (up to 14): coincide with rings  
All rings with types: [6a.6c.6c.(6a,6b).(6a,6b).6b(2).(6b,6c).(6b,6c).6b(2).\*]  
ATTENTION! Some rings \* are bigger than 14, so likely no rings are contained in that angle

-----  
ZE1 Point (Schlafli) symbol: {6^3}  
Extended point symbol:[6(3).6(3).6(3)]  
Rings coincide with circuits  
All rings (up to 14): coincide with rings  
All rings with types: [(6a,6b(2)).(6a,6b(2)).(6a,6c(2))]

-----  
Point (Schlafli) symbol for net: {6^3}{6^9;8}  
3,5-c net with stoichiometry (3-c)(5-c); 2-nodal net

Topological type: seh-3,5-Cmc21 {6^3}{6^9;8} - VS [6.6.6.6(2).6(2).6(2).6(2).6(2).6(2).6(2).\*]  
[6(3).6(3).6(3)] (66909 types in 9 databases)

## Non-equivalent circuits

-----  
Circuit No 1; Type=6a; Centroid: (0.500,0.269,0.953)

-----  
Atom x y z  
-----  
ZD1 0.0000 0.4228 1.1192  
ZE1 0.0000 0.1925 0.7858  
ZD1 0.5000 0.0772 0.6192  
ZE1 1.0000 0.1925 0.7858

ZD1 1.0000 0.4228 1.1192  
ZE1 0.5000 0.3075 1.2858

Circuit No 2; Type=6b; Centroid: (0.333,0.167,0.091)

```
-----  
Atom   x   y   z  
-----  
ZD1    0.0000 0.4228 0.1192  
ZE1    0.0000 0.1925 -0.2142  
ZD1    0.5000 0.0772 -0.3808  
ZD1    0.5000 -0.0772 0.1192  
ZD1    0.5000 0.0772 0.6192  
ZE1    0.5000 0.3075 0.2858
```

Circuit No 3; Type=6c; Centroid: (0.500,0.500,0.925)

```
-----  
Atom   x   y   z  
-----  
ZE1    0.5000 0.3075 1.2858  
ZD1    1.0000 0.4228 1.1192  
ZD1    1.0000 0.5772 0.6192  
ZE1    0.5000 0.6925 0.7858  
ZD1    0.0000 0.5772 0.6192
```

Elapsed time: 10.22 sec.

Structure #1 - "MOFCJ3".

Structure of dimension 3.  
Given space group is I4cm.  
12 nodes and 24 edges in repeat unit as given.

Given repeat unit is accurate.  
Point group has 8 elements.  
2 kinds of node.

Coordination sequences:  
Node 1: 3 14 19 64 53 148 105 268 173 420  
Node 2: 6 10 38 36 106 80 210 140 346 218

TD10 = 1242.3333

Ideal space group is I4cm.

Structure is new for this run.

Relaxed cell parameters:

a = 3.57081, b = 3.57081, c = 2.55967

alpha = 90.0000, beta = 90.0000, gamma = 90.0000

Cell volume: 32.63757

Relaxed positions:

Node 1: 0.07703 0.27682 0.23067

Node 2: 0.31936 0.18064 0.08842

Edges:

0.07703 0.27682 0.23067 <-> 0.18064 0.31936 0.58842

0.07703 0.27682 0.23067 <-> 0.31936 0.18064 0.08842

0.07703 0.27682 0.23067 <-> -0.18064 0.31936 0.08842

Edge centers:

0.12884 0.29809 0.40954

0.19820 0.22873 0.15954

-0.05180 0.29809 0.15954

Edge statistics: minimum = 0.99924, maximum = 1.00113, average = 1.00000

Angle statistics: minimum = 43.32442, maximum = 135.65923, average = 106.63495

Shortest non-bonded distance = 0.73799

Degrees of freedom: 6

Finished structure #1 - "MOFCJ3".

Finished data file "/Applications/Che/systre/MOFCJ3.cgd".

Data file "/Applications/Che/systre/katezn1.cgd".

Structure #1 - "kateZn1".

Structure of dimension 3.  
Given space group is Cmc21.  
24 nodes and 48 edges in repeat unit as given.

Ideal repeat unit smaller than given (24 vs 48 edges).  
Point group has 8 elements.  
2 kinds of node.

Equivalences for non-unique nodes:

2 --> 1  
3 --> 1  
4 --> 1  
6 --> 5  
7 --> 5

Coordination sequences:

Node 5: 6 10 38 36 106 80 210 140 346 218  
Node 1: 3 14 19 64 53 148 105 268 173 420

TD10 = 1242.3333

Ideal space group is I4cm.  
Ideal group differs from given (I4cm vs Cmc21).

Structure already seen in this run.

Name: MOFCJ3

Relaxed cell parameters:

a = 3.57099, b = 3.57099, c = 2.55944  
alpha = 90.0000, beta = 90.0000, gamma = 90.0000

Cell volume: 32.63792

Relaxed positions:

Node 5: 0.18065 0.31935 0.25059  
Node 1: 0.27654 0.07695 0.39293

Edges:

0.18065 0.31935 0.25059 <-> 0.07695 0.27654 -0.10707  
0.18065 0.31935 0.25059 <-> 0.27654 0.07695 0.39293  
0.18065 0.31935 0.25059 <-> 0.22346 0.57695 0.39293

Edge centers:

0.12880 0.29794 0.07176  
0.22860 0.19815 0.32176  
0.20206 0.44815 0.32176

Edge statistics: minimum = 0.99924, maximum = 1.00116, average = 1.00000  
Angle statistics: minimum = 43.44165, maximum = 135.67105, average = 106.63958

Shortest non-bonded distance = 0.73987

Degrees of freedom: 6

Finished structure #1 - "kateZn1".

Finished data file "/Applications/Che/systre/katezn1.cgd".

Data file "/Applications/Che/systre/katezn2.cgd".

Structure #1 - "kateZn2".

Structure of dimension 3.  
Given space group is P21.  
4 nodes and 8 edges in repeat unit as given.

Given repeat unit is accurate.  
Point group has 4 elements.  
2 kinds of node.

Coordination sequences:  
Node 2: 3 12 28 47 80 120 147 202 276 303  
Node 1: 5 14 30 55 82 114 165 210 254 335

TD10 = 1242.0000

Ideal space group is Cmc21.  
Ideal group differs from given (Cmc21 vs P1211).

Structure is new for this run.

Relaxed cell parameters:  
a = 1.73055, b = 3.60698, c = 1.66591  
alpha = 90.0000, beta = 90.0000, gamma = 90.0000

Cell volume: 10.39874

Relaxed positions:  
Node 2: 0.50000 0.30752 0.28583  
Node 1: 0.00000 0.42283 0.11919

Edges:  
0.00000 0.42283 0.11919 <-> 0.50000 0.30752 0.28583  
0.00000 0.42283 0.11919 <-> 0.00000 0.19248 -0.21417  
0.00000 0.42283 0.11919 <-> 0.00000 0.57717 -0.38081

Edge centers:  
0.25000 0.36518 0.20251  
0.00000 0.30765 -0.04749  
0.00000 0.50000 -0.13081

Edge statistics: minimum = 0.99937, maximum = 1.00186, average = 1.00000  
Angle statistics: minimum = 78.95149, maximum = 157.51507, average = 108.68836  
Shortest non-bonded distance = 1.27072

Degrees of freedom: 6

Finished structure #1 - "kateZn2".

Finished data file "/Applications/Che/systre/katezn2.cgd".



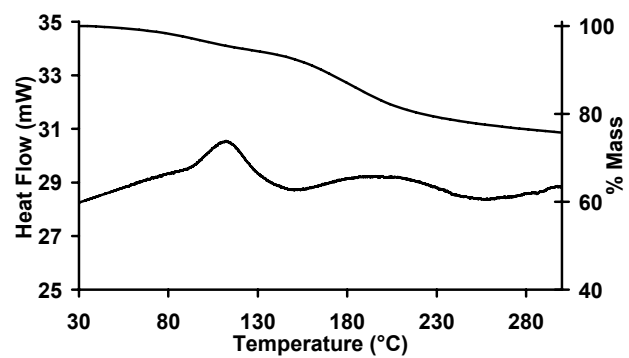

TG and DSC curves for **1**.

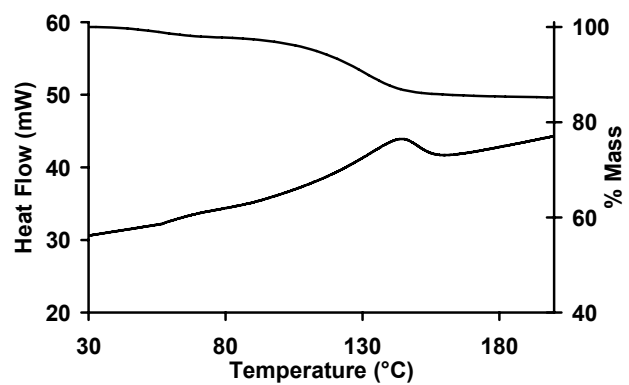

TG and DSC curves for **2**.
